# Supplementary material
Source: Royal Society of Chemistry journal article supplement (doi:10.1039/d6nr00412a)
Supplement: d6nr00412a1.pdf [file d6nr00412a1.pdf]

## Supporting Information

### **Near-infrared photovoltaic gating enables polarity - reconfigurable WSe<sub>2</sub> phototransistors for in-sensor computing**

Xueling Lu<sup>†a,b</sup>, Yangyang Lv<sup>†b</sup>, Haifeng Wu<sup>†b</sup>, Jiali Yi<sup>b</sup>, Guangcheng Wu<sup>b</sup>, Huawei Liu<sup>a\*</sup>, Zhaoqian Wang<sup>b</sup>, Qijun Zong<sup>b</sup>, Qin Shuai<sup>b</sup>, Lulu Huang<sup>a</sup>, Huanghua Xu<sup>b</sup>, Xinjian Li<sup>c</sup>, Di Wu<sup>c</sup>, Xiaoli Zhu<sup>b\*</sup>, Dong Li<sup>b\*</sup> and Anlian Pan<sup>a,b\*</sup>

<sup>a</sup>School of Physics and Electronics, Hunan Normal University, Changsha, Hunan, 410081, China

<sup>b</sup>Key Laboratory for Micro-Nano Physics and Technology of Hunan Province, State Key Laboratory of Chemo/Biosensing and Chemometrics, State Key Laboratory of Advanced Design and Manufacturing Technology for Vehicle, Hunan Institute of Optoelectronic Integration, College of Materials Science and Engineering, Hunan University, Changsha, 410082, China

<sup>c</sup>School of Physics and Microelectronics, Key Laboratory of Material Physics Ministry of Education, Zhengzhou University, Zhengzhou, Henan, 450052, China

<sup>†</sup>These authors contributed equally to this work.

\*Email: hwliu@hnu.edu.cn, liidong@hnu.edu.cn, zhuxiaoli@hnu.edu.cn, anlian.pan@hnu.edu.cn

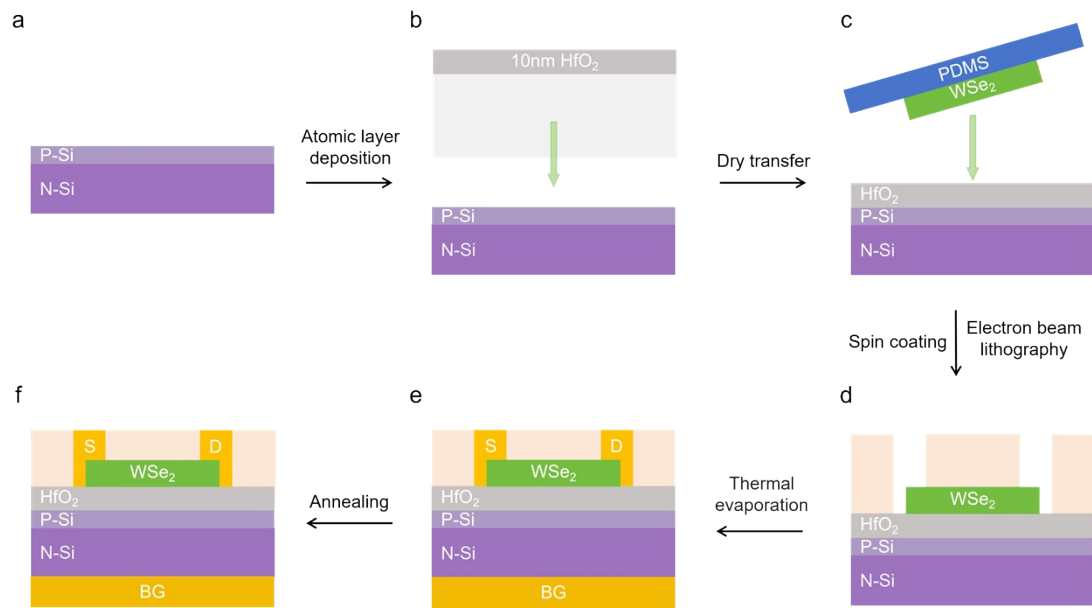

Figure S1. Schematic diagram of the device fabrication process. (a) Preparation of the Si PN junction substrate. (b) Deposition of a 10 nm-thick  $\text{HfO}_2$  high- $\kappa$  dielectric layer via atomic layer deposition (ALD). (c) Transfer of the mechanically exfoliated  $\text{WSe}_2$  flake onto the substrate surface by a PDMS-assisted dry transfer technique. (d) Patterning of the source and drain electrodes via spin coating PMMA and electron beam lithography (EBL). (e) Deposition of metal contacts using thermal evaporation. (f) Schematic of the final device structure after thermal annealing to enhance contact quality.

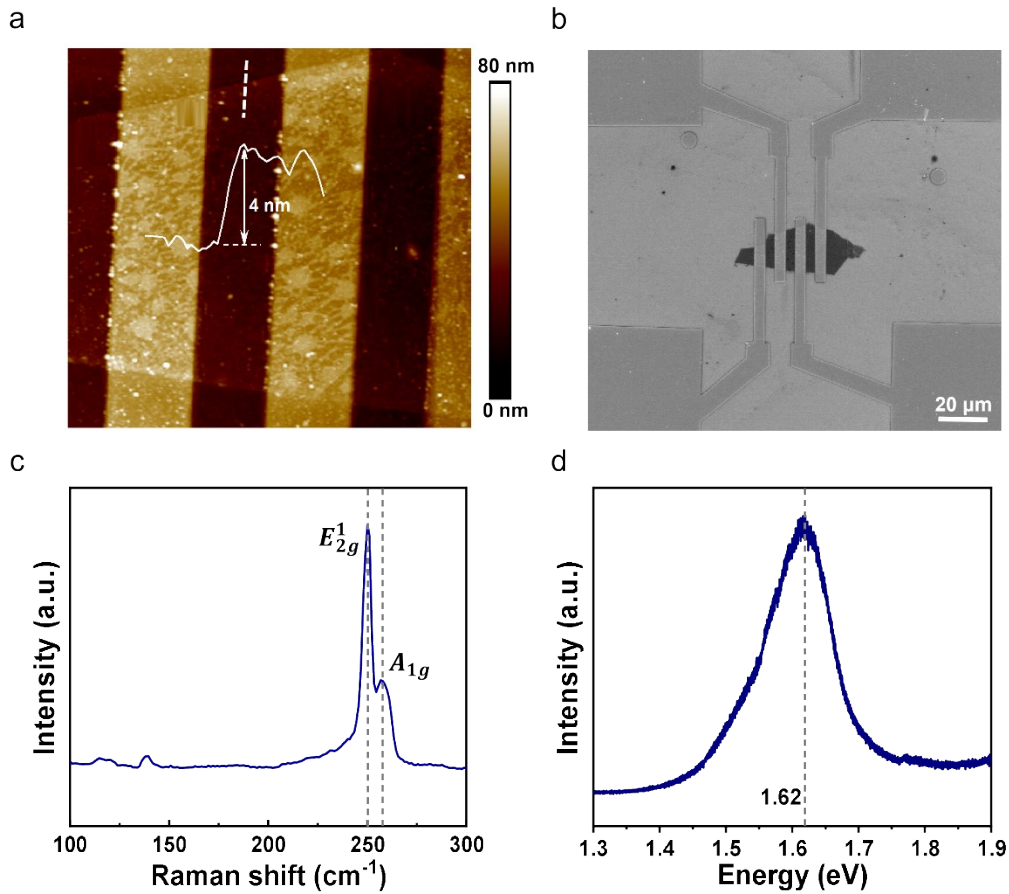

Figure S2. Device Characterization. (a) Atomic force microscopy (AFM) image of the sample and the thickness of the WSe<sub>2</sub> channel on the substrate. (b) SEM image of the samples, the scale bar is 20 μm. (c) Raman spectrum of the WSe<sub>2</sub> channel, the characteristic peaks confirm the high crystalline quality and few-layer nature. (d) Photoluminescence (PL) spectrum of WSe<sub>2</sub> under 532 nm laser excitation, displaying an emission typical of a few WSe<sub>2</sub> with a strong peak at 1.62 eV.

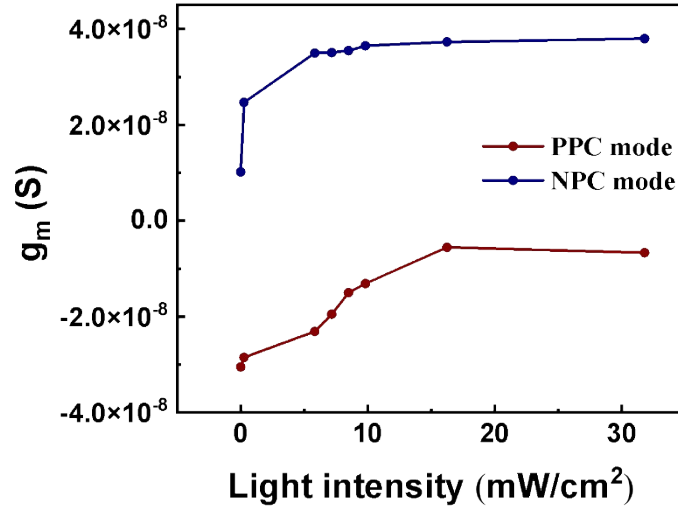

Figure S3. Transconductance ( $g_m$ ) of the  $\text{WSe}_2$  phototransistor as a function of light intensity under PPC-mode and NPC-mode operation. The transconductance is extracted from the transfer characteristics at a fixed drain bias. The results show that  $g_m$  increases with illumination intensity and exhibits distinct modulation behavior in the two operation modes, reflecting the tunable photogating effect induced by the Si PN junction.

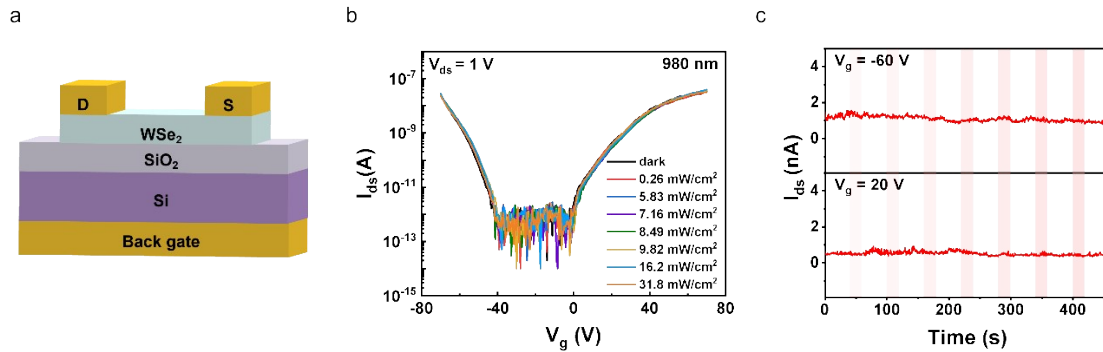

Figure S4. Control experiment performed on a  $\text{WSe}_2/\text{SiO}_2/\text{Si}$  device. (a) Schematic diagram of the comparative device structure. (b) Transfer characteristic curves under 980 nm illumination with varying power densities. The overlapping curves exhibit no threshold voltage shift or photogating effect from the  $\text{SiO}_2/\text{Si}$  substrate, indicating the optical transparency of  $\text{WSe}_2$  at this wavelength. (c) I-t curve measurements under fixed bias. The current remains at the baseline level without generating observable photocurrent during light switching. These results further effectively corroborating

that the photoresponse in the primary device originates exclusively from the photovoltaic effect of the underlying Si PN junction.

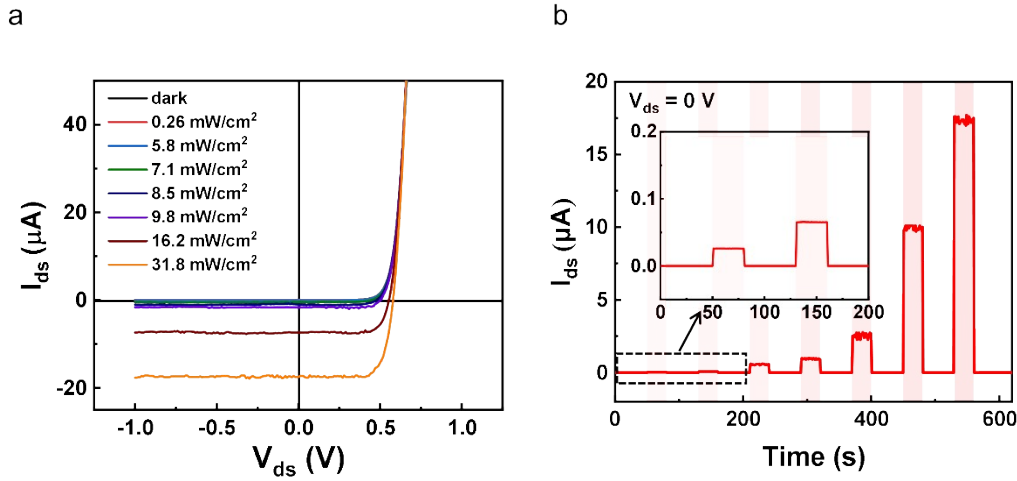

Figure S5. Control experiment characterizing the photovoltaic properties of the bare Si PN junction substrate (without WSe<sub>2</sub> channel). (a) I-V characteristic curves of the bare Si PN junction under varying light intensities at  $V_g = 0$  V. The curves exhibit a distinct photovoltaic effect with a non-zero open-circuit voltage ( $V_{oc}$ ) under illumination. This generated  $V_{oc}$  serves as the driving force for the threshold voltage shift observed in the device. (b) I-t photoresponse map at a fixed bias of  $V_{ds} = 0$  V. The stepwise current modulation verifies the efficient generation of photocarriers and stable photovoltage by the substrate under infrared illumination, providing the photogating signal source for the overlying device.

| Structure                                                                 | wavelength (nm) | Mechanism           | dark current (nA) | Responsivity (A/W) | Reconfigurable | Threshold voltage shift (V) | Ref.                               |
|---------------------------------------------------------------------------|-----------------|---------------------|-------------------|--------------------|----------------|-----------------------------|------------------------------------|
| WSe <sub>2</sub> /HfO <sub>2</sub> /Si PN                                 | 980             | Photovoltaic gating | ~2/0.02           | 62.3/14.5          | √              | ~0.4                        | This work                          |
| MoS <sub>2</sub> /Si PN                                                   | 780/880/970     | Photovoltaic gating | 400               | ~45                | ×              | ---                         | ACS Nano 2025, 19, 12053-12062     |
| WSe <sub>2</sub> /Ta <sub>2</sub> NiSe <sub>5</sub> /SiO <sub>2</sub> /Si | 532/635/785     | Photovoltaic        | ~10               | ~10 <sup>3</sup>   | √              | ~0.4                        | ACS Nano 2025, 19, 1302-1315       |
| WSe <sub>2</sub> /hBN/MLG/SiO <sub>2</sub> /Ge                            | 532/1550        | Photogating         | ~2/20             | 2.98               | √              | ---                         | Adv. Sci. 2025, 12, e12649         |
| WSe <sub>2</sub> homojunction/SiO <sub>2</sub> /Si                        | 405/670/808     | Photogating         | ---               | 0.31               | √              | ---                         | ACS Photonics 2026, 13, 1, 236-248 |
| DPP-DTT/PDMS/Ag gate/PDMS                                                 | 405/532/635/808 | Photoelectric       | ~9                | ~10                | √              | ---                         | Nano Energy 2023, 110, 2211-2855   |

Table S1. Comparison of representative NIR phototransistors with reconfigurable capabilities reported in recent years. The table summarizes key device parameters, including structure, operating wavelength, operating mechanism, dark current, responsivity, detectivity, and reconfigurability<sup>1-5</sup>.

| Type          | Wafer Orientation | Reference Agent | Resistance( $\Omega$ ) | Thickness( $\mu\text{m}$ ) |
|---------------|-------------------|-----------------|------------------------|----------------------------|
| P(Appearance) | (100)             | B               | 3                      | 1~2                        |
| N             | (100)             | SB              | 0.01-0.02              | 450                        |

Table S2: Structural parameters of the Si PN junction substrate.

| Material         | Carrier type | Mobility                                                | band gap | Electron affinity | Work function | Absorption range |
|------------------|--------------|---------------------------------------------------------|----------|-------------------|---------------|------------------|
| WSe <sub>2</sub> | Ambipolar    | ~10–200 cm <sup>2</sup> V <sup>-1</sup> s <sup>-1</sup> | 1.62 eV  | ~3.9–4.0 eV       | ~4.5–5.0 eV   | <765 nm          |

Table S3. Electrical and optical properties of WSe<sub>2</sub>.

## References:

1. S. S. Mousavi Khaleghi, J. Wei, Y. Liu, Y. Wang, Z. Fan, K. Li, J. Chen, R. Kudrawiec, R. Yang, K. B. Crozier and Y. Dan, *ACS Nano*, 2025, **19**, 12053-12062.
2. M. Liu, J. Wei, L. Qi, J. An, X. Liu, Y. Li, Z. Shi, D. Li, K. S. Novoselov, C.-W. Qiu and S. Li, *Nature Communications*, 2024, **15**, 141.
3. Q. Zhang, Y. Zhang, X. Liu, N. Zhang, T. Miao, H. Hu, L. Wang and Z. Zhu, *Advanced Science*, 2025, **12**, e12649.
4. X. Song, F. Liu, Z. Ma, X. Bie, H. Yang, Y. Jiang, S. Zhang, L. Yu, C. Jiang and C. Xia, *ACS Photonics*, 2026, **13**, 236-248.
5. S. Guo, H. Xu, Y. Zheng, L. Li, Z. Li, L. Zhang, H. Zhang, X. Wang, J. Li, L. Wang, L. Liu and Z. Lou, *Nano Energy*, 2023, **110**, 108361.
